# Supplementary material
Source: HighWire-hosted journal article supplement (https://www.cancerbiomed.org/content/19/4/486)
Supplement: media-1 [file media-1.pdf]

## Supplementary materials

**Table S1** The sequences of plasmid primers and siRNA

| Plasmid/siRNA name       | Primer/siRNA sequence                                                          |
|--------------------------|--------------------------------------------------------------------------------|
| Flag-C-Hsp90 $\alpha$    |                                                                                |
| F1                       | 5'-GGACGACGATGACAAGTTTGAGGGGAAGACTTTAGTGTC-3'                                  |
| F2                       | 5'-CCGCTCGAGATGGATTACAAGGACGACGATGACAAG-3'                                     |
| R                        | 5'-CGCGGATCCTTAGTCTACTTCTCCATGCGTG-3'                                          |
| Flag-N-Hsp90 $\alpha$    |                                                                                |
| F1                       | 5'-GGACGACGATGACAAG GACCAACCGATGGAGGAGGAG-3'                                   |
| F2                       | 5'-CCGCTCGAGATGGATTACAAGGACGACGATGACAAG-3'                                     |
| R                        | 5'-CGCGGATCCTCATTGAGCCTCATCATCGCTTA-3'                                         |
| Flag-M-Hsp90 $\alpha$    |                                                                                |
| F1                       | 5'-GGACGACGATGACAAGAAGGAAGACAAAGAAGAAGAAAAAG-3'                                |
| F2                       | 5'-CCGCTCGAGATG GATTACAAGGACGACGATGACAAG-3'                                    |
| R                        | 5'-CGCGGATCCTCACATATAGATCACTTCTAAGCC-3'                                        |
| Flag-Hsp90 $\alpha$      |                                                                                |
| F                        | 5'-CCGCTCGAGATGGATTACAAGGATGACGACGATAAGATGCTGAGGAAACCCAGACC-3'                 |
| R                        | 5'-CGCGGATCCTTAGTCTACTTCTCCATGCGTG-3'                                          |
| Flag-Hsp90 $\alpha$ E47A |                                                                                |
| F                        | 5'-AAGAGATCTTCTGAGAGCGCTCATTCAAATTCATCA-3'                                     |
| R                        | 5'-TGATGAATTTGAAATGAGCGCTCTCAGAAAGATCTCTT-3'                                   |
| Flag-Hsp90 $\alpha$ D93A |                                                                                |
| F                        | 5'-GAACTCTCACTATTGTGGCTACTGGAATTGGAATGAC-3'                                    |
| R                        | 5'-GTCATTCCAATTCAGTAGCCACAATAGTGAGAGTTC-3'                                     |
| NC siRNA                 |                                                                                |
|                          | Sense: 5'-UUCUCCGAACGUGUCACGUTT-3';<br>Antisense: 5'-ACGUGACACGUUCGGAGAATT-3'. |
| Hsp90 siRNA              |                                                                                |
| #1                       | Sense: 5'-CCCUUCUAAUUUGUCCACGTT-3';<br>Antisense: 5'-CGUGGGACAAUAGAAGGTT-3'.   |
| #2                       | Sense: 5'-GGACAGUUGGAAUUCAGAGTT-3';<br>Antisense: 5'-CUCUGAAUCCAACUGUCCTT-3'.  |
| PGK1 siRNA               |                                                                                |
| #1                       | Sense: 5'-GCUUCUGGGAACAAGGUUATT-3';<br>Antisense: 5'-UAACCUUGUCCAGAAGCTT-3'.   |
| #2                       | Sense: 5'-CCUGGAAGGUAAAGUCCUUTT-3';<br>Antisense: 5'-AAGGACUUUACCUCCAGGTT-3'.  |

Table S1 Continued

| Plasmid/siRNA name | Primer/siRNA sequence                                                          |
|--------------------|--------------------------------------------------------------------------------|
| HOP siRNA          |                                                                                |
| #1                 | Sense: 5'-GCUACUCCGAAGCUAUUAATT-3';<br>Antisense: 5'-UUAAUAGCUUCGGAGUAGCTT-3'. |
| #2                 | Sense: 5'-GCAAGACUGUCGACCUAAATT-3';<br>Antisense: 5'-UUUAGGUCGACAGUCUUGCTT-3'. |
| #3                 | Sense: 5'-GCCAGAGCCAAUGGAAGAATT-3';<br>Antisense: 5'-UUCUUCCAUUGGCUCUGGCTT-3'. |
| CDC37 siRNA        |                                                                                |
| #1                 | Sense: 5'-ACACAAGACCUUCGUGGAATT-3';<br>Antisense: 5'-UUCCACGAAGGUCUUGUGUTT-3'. |
| #2                 | Sense: 5'-CGGCAGUUCUUCACUAAGATT-3';<br>Antisense: 5'-UCUUGUGAAGAACUGCCGTT-3'.  |
| GSK3 $\beta$ siRNA |                                                                                |
| #1                 | Sense: 5'-GCUGGAGUAUACACCAACUTT-3';<br>Antisense: 5'-AGUUGGUGUAUACUCCAGCTT-3'. |
| #2                 | Sense: 5'-GGACAAGAGAUUUAAAGAUUTT-3';<br>Antisense: 5'-AUUCUAAAUCUCUUGUCCTT-3'. |

**Table S2** Mass spectrometry analysis of proteins interacting with glycogen synthase kinase-3

| Accession                      | Score | Mass    | Matches | Sequences | emPAI | Name                                                                                              |
|--------------------------------|-------|---------|---------|-----------|-------|---------------------------------------------------------------------------------------------------|
| sp P35579 MYH9_HUMAN           | 1.026 | 227,646 | 47      | 32        | 0.84  | Myosin-9 OS = Homo sapiens OX = 9606 GN = MYH9 PE = 1 SV = 4                                      |
| sp P60709 ACTB_HUMAN           | 344   | 42,052  | 18      | 10        | 2.11  | Actin, cytoplasmic 1 OS = Homo sapiens OX = 9606 GN = ACTB PE = 1 SV = 1                          |
| tr A0A075B6Z2 A0A075B6Z2_HUMAN | 248   | 2,220   | 27      | 1         | 1.81  | T cell receptor alpha joining 56 (Fragment) OS = Homo sapiens OX = 9606 GN = TRAJ56 PE = 4 SV = 1 |
| tr H0YH81 H0YH81_HUMAN         | 189   | 38,226  | 7       | 5         | 0.65  | ATP synthase subunit beta (Fragment) OS = Homo sapiens OX = 9606 GN = ATP5F1B PE = 1 SV = 1       |
| sp P06702 S10A9_HUMAN          | 159   | 13,291  | 7       | 2         | 1.49  | Protein S100-A9 OS = Homo sapiens OX = 9606 GN = S100A9 PE = 1 SV = 1                             |
| sp Q02413 DSG1_HUMAN           | 139   | 114,702 | 7       | 7         | 0.22  | Desmoglein-1 OS = Homo sapiens OX = 9606 GN = DSG1 PE = 1 SV = 2                                  |
| sp P31944 CASPE_HUMAN          | 138   | 27,947  | 5       | 5         | 0.76  | Caspase-14 OS = Homo sapiens OX = 9606 GN = CASP14 PE = 1 SV = 2                                  |
| sp P81605 DCD_HUMAN            | 133   | 11,391  | 5       | 5         | 2.73  | Dermcidin OS = Homo sapiens OX = 9606 GN = DCD PE = 1 SV = 2                                      |
| tr A0A0C4DGB6 A0A0C4DGB6_HUMAN | 121   | 71,177  | 4       | 4         | 0.2   | Serum albumin OS = Homo sapiens OX = 9606 GN = ALB PE = 1 SV = 1                                  |
| tr A0A087WVQ9 A0A087WVQ9_HUMAN | 116   | 48,195  | 5       | 4         | 0.39  | Elongation factor 1-alpha 1 OS = Homo sapiens OX = 9606 GN = EEF1A1 PE = 1 SV = 1                 |
| sp Q6UWP8 SBSN_HUMAN           | 114   | 60,562  | 6       | 4         | 0.3   | Suprabasin OS = Homo sapiens OX = 9606 GN = SBSN PE = 1 SV = 2                                    |
| sp P01040 CYTA_HUMAN           | 113   | 11,000  | 4       | 4         | 1.98  | Cystatin-A OS = Homo sapiens OX = 9606 GN = CSTA PE = 1 SV = 1                                    |
| sp P14923 PLAK_HUMAN           | 109   | 82,434  | 5       | 4         | 0.22  | Junction plakoglobin OS = Homo sapiens OX = 9606 GN = JUP PE = 1 SV = 3                           |
| sp P00558 PGK1_HUMAN           | 99    | 44,985  | 5       | 3         | 0.43  | Phosphoglycerate kinase 1 OS = Homo sapiens OX = 9606 GN = PGK1 PE = 1 SV = 3                     |
| sp P15924 DESP_HUMAN           | 96    | 334,021 | 6       | 4         | 0.05  | Desmoplakin OS = Homo sapiens OX = 9606 GN = DSP PE = 1 SV = 3                                    |
| tr F8VPE3 F8VPE3_HUMAN         | 95    | 14,598  | 3       | 2         | 0.87  | Myosin light polypeptide 6 (Fragment) OS = Homo sapiens OX = 9606 GN = MYL6 PE = 1 SV = 1         |
| sp P12273 PIP_HUMAN            | 94    | 16,847  | 3       | 3         | 0.73  | Prolactin-inducible protein OS = Homo sapiens OX = 9606 GN = PIP PE = 1 SV = 1                    |
| sp Q9ULV4 COR1C_HUMAN          | 92    | 53,899  | 5       | 4         | 0.27  | Coronin-1C OS = Homo sapiens OX = 9606 GN = CORO1C PE = 1 SV = 1                                  |
| sp P29508 SPB3_HUMAN           | 91    | 44,594  | 7       | 5         | 0.43  | Serpin B3 OS = Homo sapiens OX = 9606 GN = SERPINB3 PE = 1 SV = 2                                 |
| sp P31151 S10A7_HUMAN          | 90    | 11,578  | 5       | 5         | 2.69  | Protein S100-A7 OS = Homo sapiens OX = 9606 GN = S100A7 PE = 1 SV = 4                             |
| sp P68871 HBB_HUMAN            | 90    | 16,102  | 3       | 3         | 0.77  | Hemoglobin subunit beta OS = Homo sapiens OX = 9606 GN = HBB PE = 1 SV = 2                        |
| sp P02489 CRYAA_HUMAN          | 86    | 20,011  | 3       | 1         | 0.17  | Alpha-crystallin A chain OS = Homo sapiens OX = 9606 GN = CRYAA PE = 1 SV = 2                     |
| sp Q5D862 FILA2_HUMAN          | 86    | 249,296 | 4       | 4         | 0.05  | Filaggrin-2 OS = Homo sapiens OX = 9606 GN = FLG2 PE = 1 SV = 1                                   |
| sp Q71U36 TBA1A_HUMAN          | 82    | 50,788  | 4       | 3         | 0.21  | Tubulin alpha-1A chain OS = Homo sapiens OX = 9606 GN = TUBA1A PE = 1 SV = 1                      |
| sp P01834 IGKC_HUMAN           | 78    | 11,929  | 2       | 1         | 0.66  | Immunoglobulin kappa constant OS = Homo sapiens OX = 9606 GN = IGKC PE = 1 SV = 2                 |

Table S2 Continued

| Accession                      | Score | Mass    | Matches | Sequences | emPAI | Name                                                                                                   |
|--------------------------------|-------|---------|---------|-----------|-------|--------------------------------------------------------------------------------------------------------|
| sp P62805 H4_HUMAN             | 77    | 11,360  | 3       | 3         | 1.22  | Histone H4 OS = Homo sapiens OX = 9606 GN = HIST1H4A PE = 1 SV = 2                                     |
| sp P07900 HSP90A_HUMAN         | 77    | 85,006  | 1       | 1         | 0.04  | Heat shock protein HSP 90-alpha OS = Homo sapiens OX = 9606 GN = HSP90AAA1 PE = 1 SV = 5               |
| tr A0A0B4J259 A0A0B4J259_HUMAN | 72    | 15,661  | 2       | 2         | 0.48  | Lysozyme OS = Homo sapiens OX = 9606 GN = LYZ PE = 1 SV = 1                                            |
| tr J3QRS3 J3QRS3_HUMAN         | 70    | 20,501  | 2       | 2         | 0.35  | Myosin regulatory light chain 12A OS = Homo sapiens OX = 9606 GN = MYL12A PE = 1 SV = 1                |
| tr Q5JP53 Q5JP53_HUMAN         | 66    | 48,135  | 3       | 3         | 0.22  | Tubulin beta chain OS = Homo sapiens OX = 9606 GN = TUBB PE = 1 SV = 1                                 |
| sp Q96P63 SPB12_HUMAN          | 66    | 46,646  | 3       | 3         | 0.23  | Serp1n B12 OS = Homo sapiens OX = 9606 GN = SERPINB12 PE = 1 SV = 1                                    |
| sp Q08554 DSC1_HUMAN           | 66    | 101,406 | 4       | 2         | 0.1   | Desmocollin-1 OS = Homo sapiens OX = 9606 GN = DSC1 PE = 1 SV = 2                                      |
| sp P05109 S10A8_HUMAN          | 65    | 10,885  | 4       | 3         | 2.01  | Protein S100-A8 OS = Homo sapiens OX = 9606 GN = S100A8 PE = 1 SV = 1                                  |
| sp Q86YZ3 HORN_HUMAN           | 62    | 283,140 | 5       | 4         | 0.06  | Hornerin OS = Homo sapiens OX = 9606 GN = HRNR PE = 1 SV = 2                                           |
| tr E7EUT5 E7EUT5_HUMAN         | 61    | 28,024  | 2       | 2         | 0.25  | Glyceraldehyde-3-phosphate dehydrogenase OS = Homo sapiens OX = 9606 GN = GAPDH PE = 1 SV = 1          |
| sp P06733 ENOA_HUMAN           | 60    | 47,481  | 2       | 2         | 0.14  | Alpha-enolase OS = Homo sapiens OX = 9606 GN = ENO1 PE = 1 SV = 2                                      |
| sp P07355 ANXA2_HUMAN          | 59    | 38,808  | 2       | 2         | 0.18  | Annexin A2 OS = Homo sapiens OX = 9606 GN = ANXA2 PE = 1 SV = 2                                        |
| sp Q13835 PKP1_HUMAN           | 58    | 84,119  | 1       | 1         | 0.04  | Plakophilin-1 OS = Homo sapiens OX = 9606 GN = PKP1 PE = 1 SV = 2                                      |
| sp P04040 CATA_HUMAN           | 56    | 59,947  | 2       | 2         | 0.11  | Catalase OS = Homo sapiens OX = 9606 GN = CAT PE = 1 SV = 3                                            |
| sp Q08188 TGM3_HUMAN           | 56    | 76,926  | 3       | 3         | 0.13  | Protein-glutamine gamma-glutamyltransferase E OS = Homo sapiens OX = 9606 GN = TGM3 PE = 1 SV = 4      |
| tr E9PKE3 E9PKE3_HUMAN         | 55    | 68,991  | 2       | 2         | 0.1   | Heat shock cognate 71 kDa protein OS = Homo sapiens OX = 9606 GN = HSPA8 PE = 1 SV = 1                 |
| sp Q9NZT1 CALL5_HUMAN          | 54    | 15,883  | 4       | 3         | 1.17  | Calmodulin-like protein 5 OS = Homo sapiens OX = 9606 GN = CALML5 PE = 1 SV = 2                        |
| sp P25705 ATPA_HUMAN           | 53    | 59,828  | 1       | 1         | 0.05  | ATP synthase subunit alpha, mitochondrial OS = Homo sapiens OX = 9606 GN = ATP5F1A PE = 1 SV = 1       |
| sp P69905 HBA_HUMAN            | 53    | 15,305  | 1       | 1         | 0.22  | Hemoglobin subunit alpha OS = Homo sapiens OX = 9606 GN = HBA1 PE = 1 SV = 2                           |
| sp Q9HCY8 S10AE_HUMAN          | 52    | 11,826  | 1       | 1         | 0.29  | Protein S100-A14 OS = Homo sapiens OX = 9606 GN = S100A14 PE = 1 SV = 1                                |
| sp Q09666 AHNK_HUMAN           | 49    | 629,213 | 1       | 1         | 0.01  | Neuroblast differentiation-associated protein AHNK OS = Homo sapiens OX = 9606 GN = AHNK PE = 1 SV = 2 |
| sp P10599 THIO_HUMAN           | 45    | 12,015  | 1       | 1         | 0.29  | Thioredoxin OS = Homo sapiens OX = 9606 GN = TXN PE = 1 SV = 3                                         |
| tr A0A1B0GU92 A0A1B0GU92_HUMAN | 43    | 60,677  | 1       | 1         | 0.05  | Uncharacterized protein OS = Homo sapiens OX = 9606 PE = 1 SV = 1                                      |

**Table S2** Continued

| Accession                      | Score | Mass    | Matches | Sequences | emPAI | Name                                                                                                                        |
|--------------------------------|-------|---------|---------|-----------|-------|-----------------------------------------------------------------------------------------------------------------------------|
| tr B1AK87 B1AK87_HUMAN         | 41    | 29,562  | 1       | 1         | 0.11  | Capping protein (actin filament) muscle Z-line, beta, isoform CRA_a OS = Homo sapiens<br>OX = 9606 GN = CAPZB PE = 1 SV = 1 |
| sp P20930 FLA_HUMAN            | 41    | 435,036 | 2       | 2         | 0.02  | Flaggrin OS = Homo sapiens OX = 9606 GN = FLG PE = 1 SV = 3                                                                 |
| tr A0A0U1RRH7 A0A0U1RRH7_HUMAN | 39    | 18,541  | 1       | 1         | 0.18  | Histone H2A OS = Homo sapiens OX = 9606 PE = 3 SV = 1                                                                       |
| sp Q01469 FABP5_HUMAN          | 38    | 15,497  | 1       | 1         | 0.22  | Fatty acid-binding protein, epidermal OS = Homo sapiens OX = 9606 GN = FABP5 PE = 1<br>SV = 3                               |
| sp P25311 ZA2G_HUMAN           | 37    | 34,465  | 2       | 2         | 0.2   | Zinc-alpha-2-glycoprotein OS = Homo sapiens OX = 9606 GN = AZGP1 PE = 1 SV = 2                                              |
| tr F5GYA2 F5GYA2_HUMAN         | 37    | 28,749  | 2       | 1         | 0.12  | Uracil-DNA glycosylase OS = Homo sapiens OX = 9606 GN = UNG PE = 1 SV = 1                                                   |
| sp P47929 LEG7_HUMAN           | 37    | 15,123  | 1       | 1         | 0.23  | Galectin-7 OS = Homo sapiens OX = 9606 GN = LGALS7 PE = 1 SV = 2                                                            |
| sp P31025 LCN1_HUMAN           | 36    | 19,409  | 1       | 1         | 0.17  | Lipocalin-1 OS = Homo sapiens OX = 9606 GN = LCN1 PE = 1 SV = 1                                                             |
| tr H0YK49 H0YK49_HUMAN         | 35    | 24,259  | 2       | 1         | 0.29  | Electron transfer flavoprotein subunit alpha, mitochondrial OS = Homo sapiens OX = 9606<br>GN = ETFA PE = 1 SV = 1          |
| tr A0A1W2PQ63 A0A1W2PQ63_HUMAN | 34    | 84,612  | 1       | 1         | 0.04  | Pleckstrin homology-like domain family B member 2 (Fragment) OS = Homo sapiens<br>OX = 9606 GN = PHLDB2 PE = 1 SV = 1       |
| sp O75223 GGCT_HUMAN           | 32    | 21,222  | 2       | 2         | 0.34  | Gamma-glutamylcyclotransferase OS = Homo sapiens OX = 9606 GN = GGCT PE = 1 SV = 1                                          |
| tr A0A087X0D5 A0A087X0D5_HUMAN | 33    | 36,873  | 1       | 1         | 0.09  | Pro-cathepsin H OS = Homo sapiens OX = 9606 GN = CTSH PE = 1 SV = 1                                                         |
| sp P05089 ARGI1_HUMAN          | 32    | 34,884  | 3       | 2         | 0.2   | Arginase-1 OS = Homo sapiens OX = 9606 GN = ARG1 PE = 1 SV = 2                                                              |
| sp Q6R2W3 SCND3_HUMAN          | 32    | 153,452 | 1       | 1         | 0.02  | SCAN domain-containing protein 3 OS = Homo sapiens OX = 9606 GN = ZBED9 PE = 2 SV = 1                                       |
| sp P06312 KV401_HUMAN          | 32    | 13,486  | 1       | 1         | 0.25  | Immunoglobulin kappa variable 4-1 OS = Homo sapiens OX = 9606 GN = IGKV4-1 PE = 1<br>SV = 1                                 |
| tr M0R1V7 M0R1V7_HUMAN         | 32    | 7,128   | 2       | 2         | 1.25  | Ubiquitin-60S ribosomal protein L40 (Fragment) OS = Homo sapiens OX = 9606<br>GN = UBA52 PE = 1 SV = 1                      |
| sp O95969 SG1D2_HUMAN          | 31    | 10,260  | 1       | 1         | 0.34  | Secretoglobulin family 1D member 2 OS = Homo sapiens OX = 9606 GN = SCGB1D2 PE = 2<br>SV = 1                                |
| sp Q81W75 SPA12_HUMAN          | 31    | 47,259  | 2       | 2         | 0.14  | Serpin A12 OS = Homo sapiens OX = 9606 GN = SERPINA12 PE = 1 SV = 1                                                         |
| sp Q9NS67 GPR27_HUMAN          | 31    | 40,590  | 1       | 1         | 0.08  | Probable G-protein coupled receptor 27 OS = Homo sapiens OX = 9606 GN = GPR27 PE = 2<br>SV = 1                              |
| sp Q9H2G2 SLK_HUMAN            | 31    | 143,234 | 1       | 1         | 0.02  | STE20-like serine/threonine-protein kinase OS = Homo sapiens OX = 9606 GN = SLK PE = 1<br>SV = 1                            |
| sp P78524 ST5_HUMAN            | 31    | 127,603 | 1       | 1         | 0.03  | Suppression of tumorigenicity 5 protein OS = Homo sapiens OX = 9606 GN = ST5 PE = 1<br>SV = 3                               |

Table S2 Continued

| Accession                      | Score | Mass    | Matches | Sequences | emPAI | Name                                                                                                                       |
|--------------------------------|-------|---------|---------|-----------|-------|----------------------------------------------------------------------------------------------------------------------------|
| sp O94906 PRPF6_HUMAN          | 30    | 107,656 | 1       | 1         | 0.03  | Pre-mRNA-processing factor 6 OS = Homo sapiens OX = 9606 GN = PRPF6 PE = 1 SV = 1                                          |
| sp P53597 SUCA_HUMAN           | 30    | 36,626  | 1       | 1         | 0.09  | Succinate--CoA ligase [ADP/GDP-forming] subunit alpha, mitochondrial OS = Homo sapiens OX = 9606 GN = SUCLG1 PE = 1 SV = 4 |
| tr E5RGS9 E5RGS9_HUMAN         | 30    | 6,260   | 1       | 1         | 0.58  | Chromatin accessibility complex protein 1 OS = Homo sapiens OX = 9606 GN = CHRAC1 PE = 1 SV = 1                            |
| sp Q8N436 CPXM2_HUMAN          | 30    | 86,443  | 1       | 1         | 0.04  | Inactive carboxypeptidase-like protein X2 OS = Homo sapiens OX = 9606 GN = CPXM2 PE = 2 SV = 3                             |
| tr F8WAJ0 F8WAJ0_HUMAN         | 29    | 84,148  | 1       | 1         | 0.04  | RNA helicase OS = Homo sapiens OX = 9606 GN = DDX31 PE = 1 SV = 2                                                          |
| sp Q9BPV8 P2Y13_HUMAN          | 29    | 41,275  | 1       | 1         | 0.08  | P2Y purinoceptor 13 OS = Homo sapiens OX = 9606 GN = P2RY13 PE = 2 SV = 3                                                  |
| tr K7EQQ1 K7EQQ1_HUMAN         | 28    | 18,732  | 1       | 1         | 0.18  | Cleft lip and palate transmembrane protein 1 (Fragment) OS = Homo sapiens OX = 9606 GN = CLPTM1 PE = 1 SV = 1              |
| tr E7EQB2 E7EQB2_HUMAN         | 28    | 78,459  | 3       | 3         | 0.13  | Lactotransferrin (Fragment) OS = Homo sapiens OX = 9606 GN = LTF PE = 1 SV = 1                                             |
| tr A0A0U1RQ15 A0A0U1RQ15_HUMAN | 27    | 58,026  | 1       | 1         | 0.06  | Sorbin and SH3 domain-containing protein 1 (Fragment) OS = Homo sapiens OX = 9606 GN = SORBS1 PE = 1 SV = 1                |
| sp P11279 LAMP1_HUMAN          | 27    | 45,367  | 1       | 1         | 0.07  | Lysosome-associated membrane glycoprotein 1 OS = Homo sapiens OX = 9606 GN = LAMP1 PE = 1 SV = 3                           |
| tr C9JM00 C9JM00_HUMAN         | 27    | 18,305  | 1       | 1         | 0.18  | Serpin B7 (Fragment) OS = Homo sapiens OX = 9606 GN = SERPINB7 PE = 1 SV = 8                                               |
| sp P14618 KPYM_HUMAN           | 27    | 58,470  | 1       | 1         | 0.06  | Pyruvate kinase PKM OS = Homo sapiens OX = 9606 GN = PKM PE = 1 SV = 4                                                     |
| tr A0A087WX19 A0A087WX19_HUMAN | 26    | 76,884  | 1       | 1         | 0.04  | IQ domain-containing protein E OS = Homo sapiens OX = 9606 GN = IQCE PE = 1 SV = 1                                         |
| tr R4GMN1 R4GMN1_HUMAN         | 26    | 56,043  | 1       | 1         | 0.06  | Motile sperm domain-containing protein 2 OS = Homo sapiens OX = 9606 GN = MOSPD2 PE = 1 SV = 1                             |
| tr A0A286YES1 A0A286YES1_HUMAN | 26    | 50,242  | 1       | 1         | 0.07  | Immunoglobulin heavy constant gamma 3 (Fragment) OS = Homo sapiens OX = 9606 GN = IGHG3 PE = 1 SV = 1                      |
| sp Q9ULJ3 ZBT21_HUMAN          | 26    | 120,564 | 1       | 1         | 0.03  | Zinc finger and BTB domain-containing protein 21 OS = Homo sapiens OX = 9606 GN = ZBTB21 PE = 1 SV = 2                     |
| sp O94776 MTA2_HUMAN           | 25    | 75,717  | 1       | 1         | 0.04  | Metastasis-associated protein MTA2 OS = Homo sapiens OX = 9606 GN = MTA2 PE = 1 SV = 1                                     |
| sp Q7ZZZ1 TICRR_HUMAN          | 25    | 212,721 | 1       | 1         | 0.02  | Treslin OS = Homo sapiens OX = 9606 GN = TICRR PE = 1 SV = 2                                                               |
| sp P22528 SPR1B_HUMAN          | 25    | 10,337  | 1       | 1         | 0.34  | Cornifin-B OS = Homo sapiens OX = 9606 GN = SPR1B PE = 1 SV = 2                                                            |
| sp Q5T750 XP32_HUMAN           | 25    | 28,557  | 1       | 1         | 0.12  | Skin-specific protein 32 OS = Homo sapiens OX = 9606 GN = XP32 PE = 1 SV = 1                                               |
| tr K7EL99 K7EL99_HUMAN         | 24    | 14,836  | 1       | 1         | 0.23  | Tubulin-folding cofactor B (Fragment) OS = Homo sapiens OX = 9606 GN = TBCB PE = 1 SV = 2                                  |

**Table S2** Continued

| Accession                        | Score | Mass    | Matches | Sequences | emPAI | Name                                                                                                                     |
|----------------------------------|-------|---------|---------|-----------|-------|--------------------------------------------------------------------------------------------------------------------------|
| tr H7C4W4 H7C4W4_HUMAN           | 23    | 2,420   | 1       | 1         | 1.61  | Follistatin-related protein 1 (Fragment) OS = Homo sapiens OX = 9606 GN = FSTL1 PE = 1 SV = 1                            |
| tr A0A0G2 QD0 A0A0G2 QD0_HUMAN   | 23    | 63,847  | 1       | 1         | 0.05  | Lanosterol synthase (Fragment) OS = Homo sapiens OX = 9606 GN = LSS PE = 1 SV = 1                                        |
| sp Q14807 KIF22_HUMAN            | 23    | 73,616  | 1       | 1         | 0.04  | Kinesin-like protein KIF22 OS = Homo sapiens OX = 9606 GN = KIF22 PE = 1 SV = 5                                          |
| sp Q9BX63 FANCL_HUMAN            | 23    | 142,785 | 2       | 1         | 0.02  | Fanconi anemia group J protein OS = Homo sapiens OX = 9606 GN = BRIPI PE = 1 SV = 1                                      |
| sp Q92556 ELMO1_HUMAN            | 23    | 84,517  | 1       | 1         | 0.04  | Engulfment and cell motility protein 1 OS = Homo sapiens OX = 9606 GN = ELMO1 PE = 1 SV = 2                              |
| tr F5H070 F5H070_HUMAN           | 23    | 150,248 | 1       | 1         | 0.02  | Lysine-specific demethylase 3A OS = Homo sapiens OX = 9606 GN = KDM3A PE = 1 SV = 2                                      |
| sp O94988 FA13A_HUMAN            | 23    | 117,600 | 1       | 1         | 0.03  | Protein FAM13A OS = Homo sapiens OX = 9606 GN = FAM13A PE = 1 SV = 2                                                     |
| tr H3BN02 H3BN02_HUMAN           | 23    | 129,653 | 1       | 1         | 0.03  | Integrin alpha-X OS = Homo sapiens OX = 9606 GN = ITGAX PE = 1 SV = 1                                                    |
| tr HOYE71 HOYE71_HUMAN           | 23    | 10,673  | 1       | 1         | 0.32  | Uncharacterized protein OBSCN-AS1 (Fragment) OS = Homo sapiens OX = 9606 GN = OBSCN-AS1 PE = 4 SV = 1                    |
| tr F5H6E2 F5H6E2_HUMAN           | 22    | 119,719 | 1       | 1         | 0.03  | Unconventional myosin-1c OS = Homo sapiens OX = 9606 GN = MYO1C PE = 1 SV = 1                                            |
| tr A0A0D9SENI1 A0A0D9SENI1_HUMAN | 21    | 88,213  | 1       | 1         | 0.04  | Prolyl endopeptidase FAP OS = Homo sapiens OX = 9606 GN = FAP PE = 1 SV = 1                                              |
| sp Q8NB4 GOLM1_HUMAN             | 21    | 45,477  | 1       | 1         | 0.07  | Golgi membrane protein 1 OS = Homo sapiens OX = 9606 GN = GOLM1 PE = 1 SV = 1                                            |
| tr U3KPT7 U3KPT7_HUMAN           | 20    | 25,117  | 1       | 1         | 0.13  | Synaptosomal-associated protein 47 (Fragment) OS = Homo sapiens OX = 9606 GN = SNAP47 PE = 1 SV = 1                      |
| sp Q9NV70 EXOC1_HUMAN            | 20    | 102,772 | 1       | 1         | 0.03  | Exocyst complex component 1 OS = Homo sapiens OX = 9606 GN = EXOC1 PE = 1 SV = 4                                         |
| sp Q6NWWY9 PR40B_HUMAN           | 19    | 99,638  | 1       | 1         | 0.03  | Pre-mRNA-processing factor 40 homolog B OS = Homo sapiens OX = 9606 GN = PRPF40B PE = 1 SV = 1                           |
| sp Q9H2Y7 ZN106_HUMAN            | 19    | 210,693 | 1       | 1         | 0.02  | Zinc finger protein 106 OS = Homo sapiens OX = 9606 GN = ZNF106 PE = 1 SV = 1                                            |
| tr E5RIG8 E5RIG8_HUMAN           | 19    | 15,899  | 1       | 1         | 0.21  | Pro-neuregulin-1, membrane-bound isoform (Fragment) OS = Homo sapiens OX = 9606 GN = NRG1 PE = 1 SV = 1                  |
| sp Q92540 SMG7_HUMAN             | 19    | 127,886 | 1       | 1         | 0.03  | Protein SMG7 OS = Homo sapiens OX = 9606 GN = SMG7 PE = 1 SV = 2                                                         |
| tr E7ERF2 E7ERF2_HUMAN           | 19    | 47,394  | 1       | 1         | 0.07  | T-complex protein 1 subunit alpha OS = Homo sapiens OX = 9606 GN = TCP1 PE = 1 SV = 1                                    |
| tr A0A0G2 JMZ6 A0A0G2 JMZ6_HUMAN | 18    | 99,019  | 1       | 1         | 0.03  | Kinesin-like protein (Fragment) OS = Homo sapiens OX = 9606 GN = KIF5C PE = 1 SV = 1                                     |
| tr MQZJ5 MQZJ5_HUMAN             | 17    | 25,892  | 1       | 1         | 0.13  | Calcium-binding mitochondrial carrier protein ScaMC-3 (Fragment) OS = Homo sapiens OX = 9606 GN = SLC25A23 PE = 1 SV = 1 |

Table S2 Continued

| Accession              | Score | Mass    | Matches | Sequences | emPAI | Name                                                                                                                   |
|------------------------|-------|---------|---------|-----------|-------|------------------------------------------------------------------------------------------------------------------------|
| tr H0Y798 H0Y798_HUMAN | 16    | 9,189   | 1       | 1         | 0.38  | Propionyl-CoA carboxylase alpha chain, mitochondrial (Fragment) OS = Homo sapiens<br>OX = 9606 GN = PCCA PE = 1 SV = 1 |
| tr H0YIP0 H0YIP0_HUMAN | 16    | 24,350  | 1       | 1         | 0.14  | Methionine--tRNA ligase, cytoplasmic (Fragment) OS = Homo sapiens OX = 9606<br>GN = MARS PE = 1 SV = 1                 |
| sp Q4VNC0 AT135_HUMAN  | 16    | 139,119 | 1       | 1         | 0.02  | Probable cation-transporting ATPase 13A5 OS = Homo sapiens OX = 9606 GN = ATP13A5<br>PE = 2 SV = 1                     |
| sp Q6PIF6 MYO7B_HUMAN  | 16    | 243,612 | 1       | 1         | 0.01  | Unconventional myosin-VIIIb OS = Homo sapiens OX = 9606 GN = MYO7B PE = 1 SV = 2                                       |
| tr H0Y525 H0Y525_HUMAN | 15    | 8,648   | 1       | 1         | 0.4   | Ethylmalonyl-CoA decarboxylase (Fragment) OS = Homo sapiens OX = 9606 GN = ECHDC1<br>PE = 1 SV = 1                     |
| sp Q6E0U4 DMKN_HUMAN   | 15    | 47,282  | 1       | 1         | 0.07  | Dermokine OS = Homo sapiens OX = 9606 GN = DMKN PE = 1 SV = 3                                                          |
